# Supplementary material
Source: PubMed Central journal article supplement (PMC6145677)
Supplement: jamapsychiatry-75-740-s001.pdf [file jamapsychiatry-75-740-s001.pdf]

## Supplementary Online Content

Firth J, Firth JA, Stubbs B, et al. Association between muscular strength and cognition in people with major depression or bipolar disorder and healthy controls. *JAMA Psychiatry*. Published online April 18, 2018. doi:10.1001/jamapsychiatry.2018.0503

**eTable 1.** Neurological/Psychiatric Conditions Which Excluded Participants

**eTable 2.** Raw Mean Scores (and 95% Range) for Measures of Interest in MDD, BPD and Healthy Control Samples

**eTable 3.** Results of Sensitivity Analyses, Showing Relationships Between Grip Strength and Cognitive Domains in Fully Adjusted Models

**eTable 4.** Full Model Outputs Showing Relationships Between Each Cognitive Domain and All of the Fixed-Effects Confounding Factors

This supplementary material has been provided by the authors to give readers additional information about their work.

eTable 1. Neurological/Psychiatric Conditions Which Excluded Participants.

|                               |                                                                                                                                                                                                                                                                                                                                                                                                                                                                                                                                                                                                                                                                                                                                                                                                                                                                           |
|-------------------------------|---------------------------------------------------------------------------------------------------------------------------------------------------------------------------------------------------------------------------------------------------------------------------------------------------------------------------------------------------------------------------------------------------------------------------------------------------------------------------------------------------------------------------------------------------------------------------------------------------------------------------------------------------------------------------------------------------------------------------------------------------------------------------------------------------------------------------------------------------------------------------|
| <p>UK Biobank Field Codes</p> | <p><b>Field 6150</b> = 3</p> <p><b>Field 20001</b> = 1031 OR 1032</p> <p><b>Field 20002</b> = 1082 1083 1086 1524 1262 1397 1683<br/>1245 1246 1491 1425 1433 1258 1263 1264 1266<br/>1244 1583 1659 1259 1240 1434</p> <p><b>Fields 41078 and 41142</b> = F20 – F29</p>                                                                                                                                                                                                                                                                                                                                                                                                                                                                                                                                                                                                  |
| <p>Condition titles</p>       | <p>Brain cancer/primary malignant tumour</p> <p>Brain haemorrhage</p> <p>Brain/intracranial abscess</p> <p>Cerebral aneurysm</p> <p>Cerebral palsy</p> <p>Chronic/degenerative neurological problem</p> <p>Dementia/Alzheimer's disease/cognitive impairment</p> <p>Encephalitis</p> <p>Epilepsy</p> <p>Head injury</p> <p>Infection of nervous system</p> <p>Ischaemic stroke</p> <p>Meningeal cancer/malignant meningioma</p> <p>Meningioma (benign)</p> <p>Meningitis</p> <p>Motor neurone disease</p> <p>Multiple sclerosis</p> <p>Neurological injury/trauma</p> <p>Neuroma (benign)</p> <p>Other demyelinating condition</p> <p>Other neurological problem</p> <p>Parkinson's disease</p> <p>Psychotic disorders (ICD-10 F20-F29)</p> <p>Spina bifida</p> <p>Stroke</p> <p>Subarachnoid haemorrhage</p> <p>Subdural haematoma</p> <p>Transient ischaemic attack</p> |

**eTable 2.** Raw Mean Scores (and 95% Range) for Measures of Interest in MDD, BPD and Healthy Control Samples

|                                         | MDD<br>(male) | MDD<br>(female) | BPD<br>(male) | BPD<br>(female) | Controls<br>(male) | Controls<br>(female) |
|-----------------------------------------|---------------|-----------------|---------------|-----------------|--------------------|----------------------|
| Handgrip score (mean average)*          | 39.1045       | 23.6902         | 38.8115       | 23.1967         | 39.5639            | 23.8347              |
| Handgrip score (lower 95% quantile)     | 20            | 10              | 20            | 9               | 22                 | 11                   |
| Handgrip score (upper 95% quantile)     | 58            | 36              | 57            | 34              | 58                 | 36                   |
| Visual memory (mean average)            | 0.4921        | 0.5132          | 0.488         | 0.5213          | 0.4657             | 0.5197               |
| Visual memory (lower 95% quantile)      | 0             | 0               | 0             | 0               | 0                  | 0                    |
| Visual memory (upper 95% quantile)      | 4             | 4               | 4             | 4               | 4                  | 4                    |
| Number memory (mean average)            | 6.8349        | 6.6089          | 6.6923        | 6.5106          | 6.8315             | 6.5789               |
| Number memory (lower 95% quantile)      | 4             | 4               | 3.85          | 3               | 4                  | 4                    |
| Number memory (upper 95% quantile)      | 9             | 9               | 9             | 9               | 9                  | 9                    |
| Reasoning score (mean average)          | 6.2052        | 5.9731          | 5.9931        | 5.5784          | 6.175              | 5.8948               |
| Reasoning score (lower 95% quantile)    | 2             | 2               | 2             | 2               | 2                  | 2                    |
| Reasoning score (upper 95% quantile)    | 11            | 10              | 11            | 10              | 11                 | 10                   |
| Reaction time (mean average)            | 557.681       | 568.6019        | 558.2594      | 573.2577        | 558.3529           | 576.9979             |
| Reaction time (lower 95% quantile)      | 395           | 405.175         | 394           | 404.475         | 397                | 410                  |
| Reaction time (upper 95% quantile)      | 879           | 871             | 866           | 847.175         | 858.45             | 882                  |
| Prospective memory (mean average)       | 0.7818        | 0.782           | 0.7638        | 0.7258          | 0.7769             | 0.7554               |
| Prospective memory (lower 95% quantile) | 0             | 0               | 0             | 0               | 0                  | 0                    |
| Prospective memory (upper 95% quantile) | 1             | 1               | 1             | 1               | 1                  | 1                    |

Notes: BPD, bipolar disorder; MDD, major depressive disorder.

\*Handgrip mean scores calculated from model with largest available sample size: MDD = 22699, BPD = 1475, Controls = 85893

**eTable 3.** Results of Sensitivity Analyses, Showing Relationships Between Grip Strength and Cognitive Domains in Fully Adjusted Models<sup>1</sup>

| Cognitive task     | Healthy controls |        |          |         | Major Depression |        |          |         | Bipolar Disorder |        |         |         |
|--------------------|------------------|--------|----------|---------|------------------|--------|----------|---------|------------------|--------|---------|---------|
|                    | Coeff.           | S.E.   | T value  | p-value | Coeff.           | S.E.   | T value  | p-value | Coeff.           | S.E.   | T value | p-value |
| Visual memory*     | -0.148           | 0.0076 | -19.5131 | <0.001  | -0.1222          | 0.0138 | -8.8439  | <0.001  | -0.0978          | 0.0542 | -1.8033 | 0.0713  |
| Reaction time*     | -0.0311          | 0.001  | -31.5824 | <0.001  | -0.0342          | 0.0018 | -18.8266 | <0.001  | -0.0392          | 0.0072 | -5.4109 | <0.001  |
| Prospective memory | 0.2768           | 0.0129 | 21.4405  | <0.001  | 0.3065           | 0.0242 | 12.6436  | <0.001  | 0.2396           | 0.091  | 2.6316  | 0.0085  |

|               |        |        |         |        |        |        |        |        |        |        |        |        |
|---------------|--------|--------|---------|--------|--------|--------|--------|--------|--------|--------|--------|--------|
| Reasoning     | 0.1372 | 0.011  | 12.4803 | <0.001 | 0.1692 | 0.02   | 8.4418 | <0.001 | 0.2963 | 0.0822 | 3.6032 | <0.001 |
| Number memory | 0.1146 | 0.0128 | 8.9542  | <0.001 | 0.1445 | 0.0237 | 6.0913 | <0.001 | 0.1802 | 0.1074 | 1.6781 | 0.0942 |

Notes: Coeff, Coefficient from Linear Mixed Model; N, number of participants; S.E. standard error  
 \*Negative relationship as lower scores = better cognitive performance  
<sup>1</sup>Adjusting waist circumference and history of vascular/heart conditions, along with age, education, gender, bodyweight and region

**eTable 4.** Full Model Outputs Showing Relationships Between Each Cognitive Domain and All of the Fixed-Effects Confounding Factors controlled for in the primary analyses (displayed in Table 2)

| Healthy controls      |         |        |          |         | Major Depression |        |          |         | Bipolar Disorder |        |         |         |
|-----------------------|---------|--------|----------|---------|------------------|--------|----------|---------|------------------|--------|---------|---------|
| Factor                | Coeff.  | S.E.   | T value  | p-value | Coeff.           | S.E.   | T value  | p-value | Coeff.           | S.E.   | T value | p-value |
| <b>Visual memory*</b> |         |        |          |         |                  |        |          |         |                  |        |         |         |
| Gender                | 0.1757  | 0.0145 | 12.1568  | <0.001  | 0.1869           | 0.0282 | 6.6225   | <0.001  | 0.1204           | 0.1061 | 1.1346  | 0.2565  |
| Age                   | 0.0188  | <0.001 | 28.2259  | <0.001  | 0.0203           | 0.0013 | 16.1469  | <0.001  | 0.0102           | 0.0047 | 2.1566  | 0.031   |
| Bodyweight            | -0.0372 | 0.0057 | -6.5486  | <0.001  | -0.0405          | 0.0105 | -3.8478  | <0.001  | -0.0237          | 0.0411 | -0.5768 | 0.564   |
| Qualifications        | -0.2871 | 0.0113 | -25.4946 | <0.001  | -0.2378          | 0.0208 | -11.4474 | <0.001  | -0.3837          | 0.0829 | -4.6279 | <0.001  |
| <b>Reaction time*</b> |         |        |          |         |                  |        |          |         |                  |        |         |         |
| Gender                | 0.0153  | 0.0019 | 7.9834   | <0.001  | 0.0256           | 0.0038 | 6.7914   | <0.001  | 0.0275           | 0.0145 | 1.9012  | 0.0575  |
| Age                   | 0.0065  | <0.001 | 78.0567  | <0.001  | 0.0068           | <0.001 | 42.4007  | <0.001  | 0.0059           | <0.001 | 9.4224  | <0.001  |
| Bodyweight            | -0.002  | <0.001 | -2.6696  | 0.0076  | <0.001           | 0.0014 | 0.1243   | 0.9011  | 0.001            | 0.0055 | -0.1128 | 0.9102  |
| Qualifications        | -0.0202 | 0.0014 | -14.6937 | <0.001  | -0.0179          | 0.0026 | -6.8838  | <0.001  | -0.0174          | 0.0103 | -1.6922 | 0.0908  |

|                           |         |        |          |        |         |        |          |        |         |        |         |        |
|---------------------------|---------|--------|----------|--------|---------|--------|----------|--------|---------|--------|---------|--------|
| <b>Prospective Memory</b> |         |        |          |        |         |        |          |        |         |        |         |        |
| Gender                    | -0.3701 | 0.0245 | -15.078  | <0.001 | -0.4911 | 0.0493 | -9.9702  | <0.001 | -0.1187 | 0.1778 | -0.6675 | 0.5045 |
| Age                       | -0.0224 | 0.0011 | -20.3095 | <0.001 | -0.0233 | 0.0022 | -10.6779 | <0.001 | -0.0186 | 0.0078 | -2.3729 | 0.0177 |
| Bodyweight                | 0.0217  | 0.0095 | 2.2852   | 0.0223 | 0.019   | 0.0181 | 1.0463   | 0.2954 | -0.0117 | 0.0676 | -0.1737 | 0.8621 |
| Qualifications            | 0.4647  | 0.0188 | 24.7243  | <0.001 | 0.4773  | 0.0365 | 13.0839  | <0.001 | 0.5366  | 0.1339 | 4.0069  | <0.001 |
| <b>Reasoning</b>          |         |        |          |        |         |        |          |        |         |        |         |        |
| Gender                    | -0.1188 | 0.0216 | -5.5074  | <0.001 | -0.1726 | 0.0417 | -4.1377  | <0.001 | -0.1961 | 0.1639 | -1.1962 | 0.2318 |
| Age                       | -0.0025 | <0.001 | -2.743   | 0.0061 | <0.001  | 0.0018 | 0.2177   | 0.8277 | 0.0155  | 0.0071 | 2.1748  | 0.0298 |
| Bodyweight                | 0.0586  | 0.0082 | 7.1556   | <0.001 | 0.0637  | 0.0149 | 4.2788   | <0.001 | 0.0991  | 0.0624 | 1.5893  | 0.1122 |
| Qualifications            | 1.3735  | 0.0153 | 89.5395  | <0.001 | 1.3396  | 0.0285 | 46.9323  | <0.001 | 1.5112  | 0.1162 | 13.0076 | <0.001 |

|                      |         |        |          |        |         |        |         |        |         |        |         |        |
|----------------------|---------|--------|----------|--------|---------|--------|---------|--------|---------|--------|---------|--------|
| <b>Number memory</b> |         |        |          |        |         |        |         |        |         |        |         |        |
| Gender               | 0.069   | 0.0251 | 2.7506   | 0.006  | 0.0325  | 0.0489 | 0.6634  | 0.5071 | 0.1398  | 0.222  | 0.6296  | 0.5294 |
| Age                  | -0.013  | 0.001  | -12.3749 | <0.001 | -0.0146 | 0.002  | -7.1449 | <0.001 | -0.0129 | 0.0096 | -1.3374 | 0.1819 |
| Bodyweight           | -0.0396 | 0.0096 | -4.1425  | <0.001 | -0.0462 | 0.0173 | -2.6729 | 0.0075 | -0.2159 | 0.0818 | -2.641  | 0.0086 |
| Qualifications       | 0.4323  | 0.0179 | 24.1267  | <0.001 | 0.38    | 0.0335 | 11.3459 | <0.001 | 0.3407  | 0.1539 | 2.2142  | 0.0274 |

Notes: Coeff, Coefficient from Linear Mixed Model; N, number of participants; S.E. standard error .

\*Negative relationship as lower scores = better cognitive performance
